# Supplementary material for: Repetitive transcranial magnetic stimulation increases the brain’s drainage efficiency in a mouse model of Alzheimer’s disease
Source: PubMed Central journal article supplement (PMC8170932; doi:10.1186/s40478-021-01198-3), 2021-06-02
Supplement: 40478_2021_1198_MOESM2_ESM.pdf [file 40478_2021_1198_MOESM2_ESM.pdf]

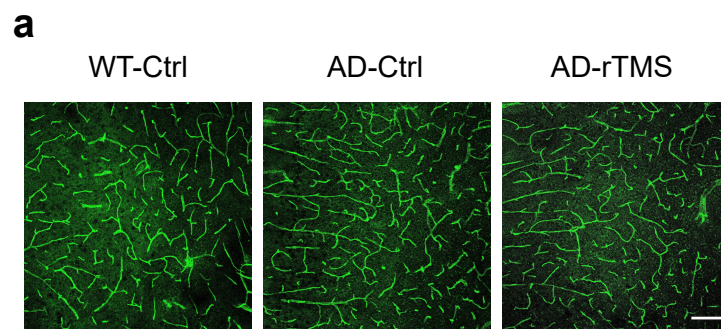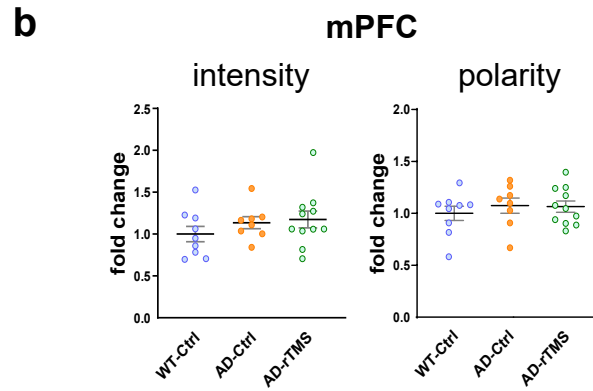

Supplementary Figure 2
